# Supplementary material
Source: publisher figshare collection journal article supplement (https://acs.figshare.com/ndownloader/files/8669893)
Supplement: Supplementary file 1 [file 8669893]

## Supporting Information

**Title:** Tailored Solution Combustion Synthesis of High Performance  $\text{ZnCo}_2\text{O}_4$  Anode Materials for Lithium-ion Batteries

*Ryan A. Adams, Vilas G. Pol, Arvind Varma\**

Davidson School of Chemical Engineering, Purdue University,  
West Lafayette, Indiana 47907, USA

\*Corresponding Author E-mail: [avarma@purdue.edu](mailto:avarma@purdue.edu)  
Telephone: 765-494-8484; Fax: 765-494-0805

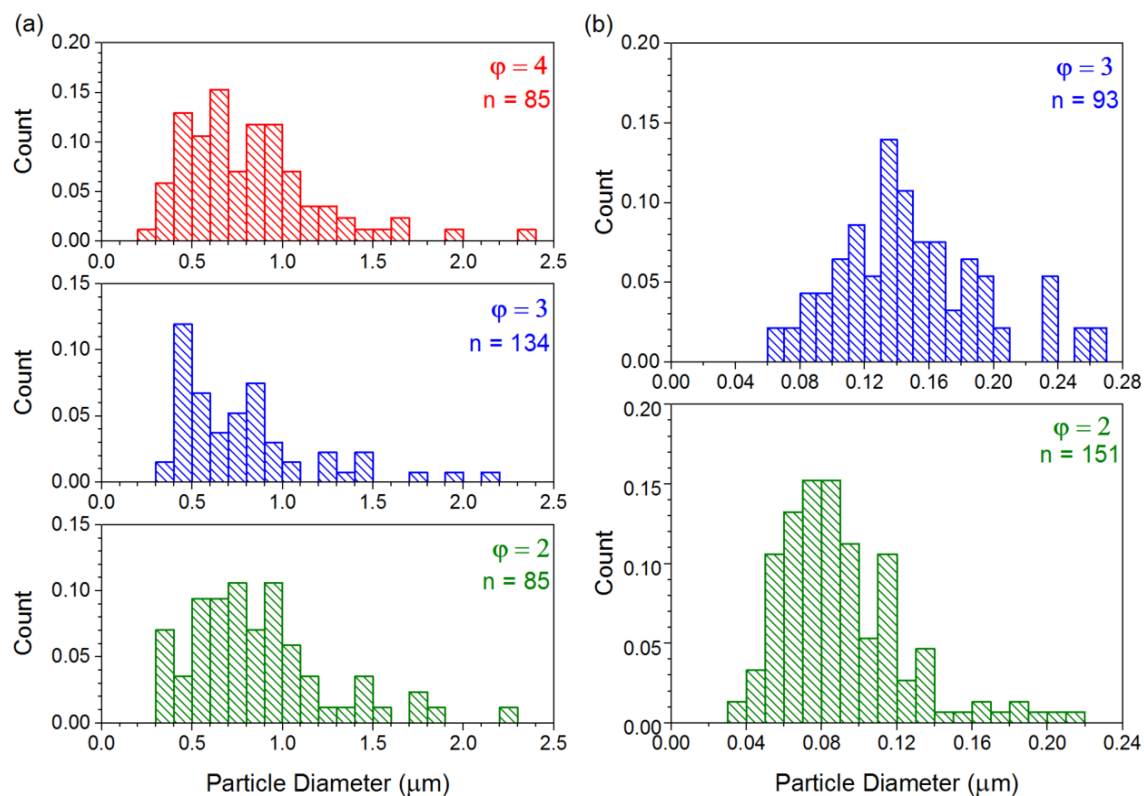

**Figure S1.** Histograms for SEM images in Figure 4. (a) Histograms from secondary particle size (agglomerates) from 3  $\mu\text{m}$  scale images. (b) Histograms for primary particle size from 500 nm scale images.  $n$  = counted species used for histogram analysis.

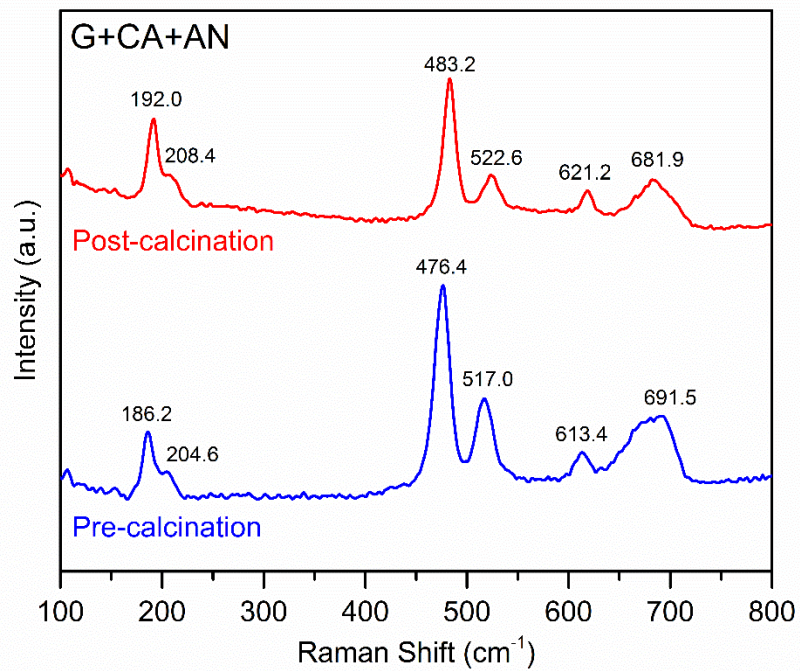

**Figure S2.** Raman spectra at 633 nm wavelength for pre-calcined and post-calcined G+CA+AN materials.

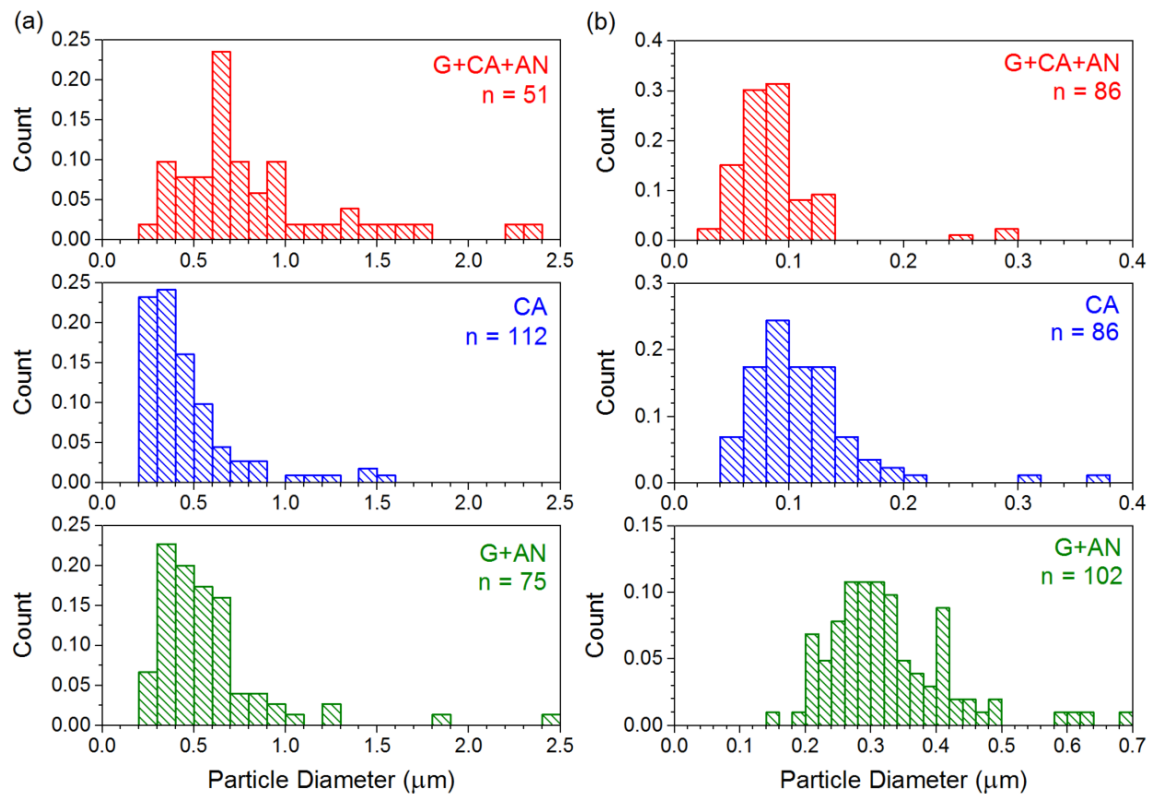

**Figure S3.** Histograms for SEM images in Figure 7. (a) Histograms for secondary particle size (agglomerates) from 3  $\mu\text{m}$  scale images. (b) Histograms for primary particle size from 500 nm scale images.

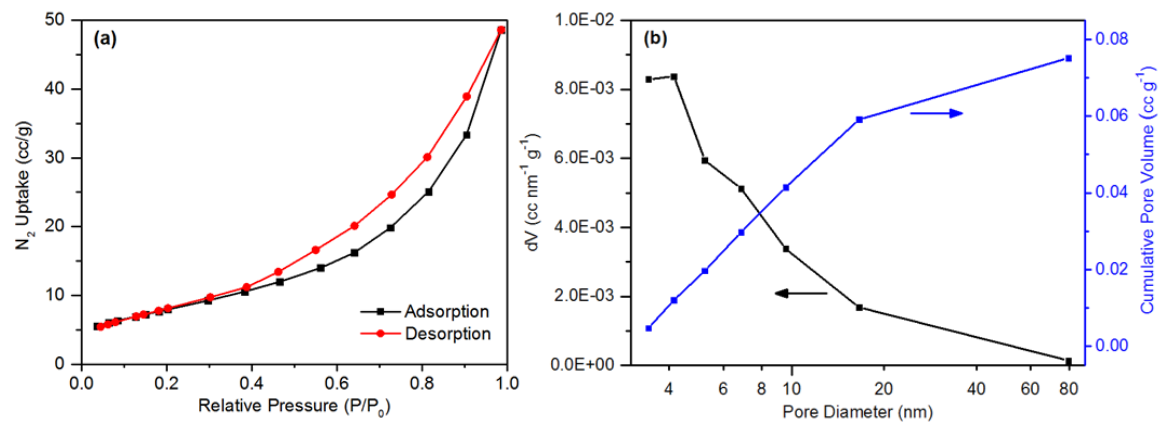

**Figure S4.** For the G+CA+AN sample, (a)  $N_2$  adsorption-desorption isotherms obtained at 77K; (b) Pore size and volume distribution curves.

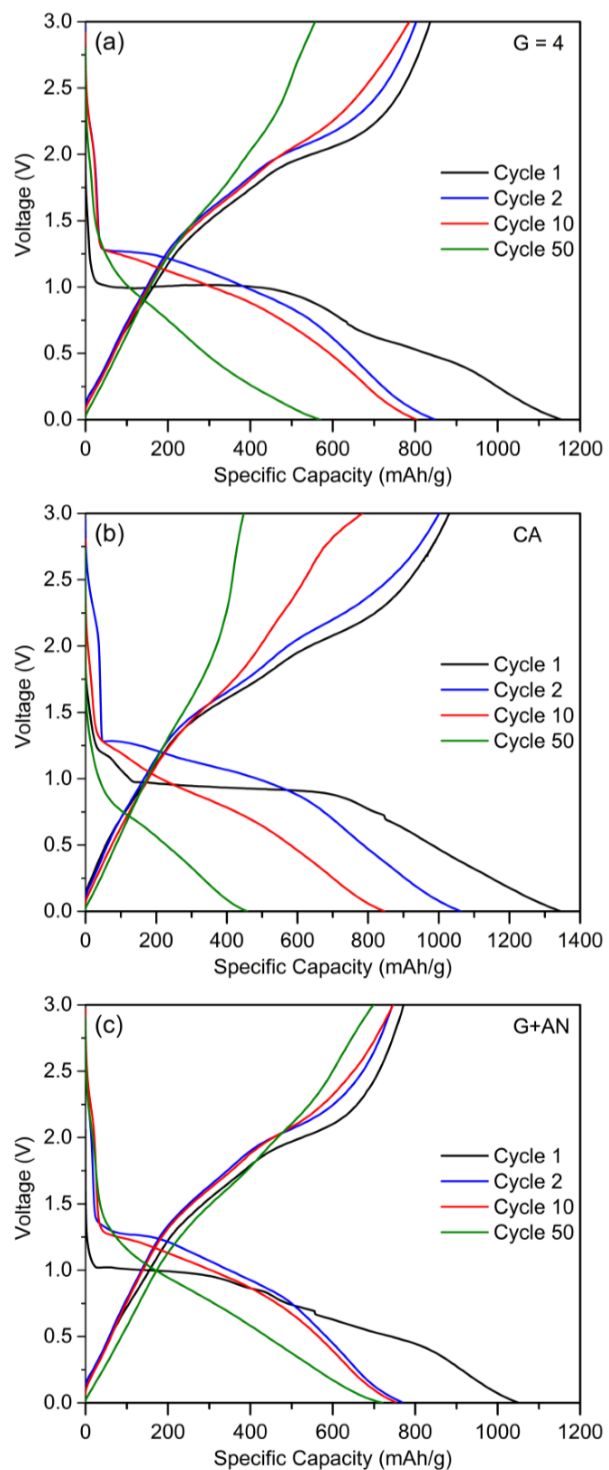

**Figure S5.** Charge-discharge voltage profiles for the  $\text{ZnCo}_2\text{O}_4$  anodes produced using various fuel systems corresponding to C/10 rate from Figures 5 and 9. (a) G:  $\Phi = 4$  calcined at  $400^\circ\text{C}$ . (b) CA. (c) G+AN.

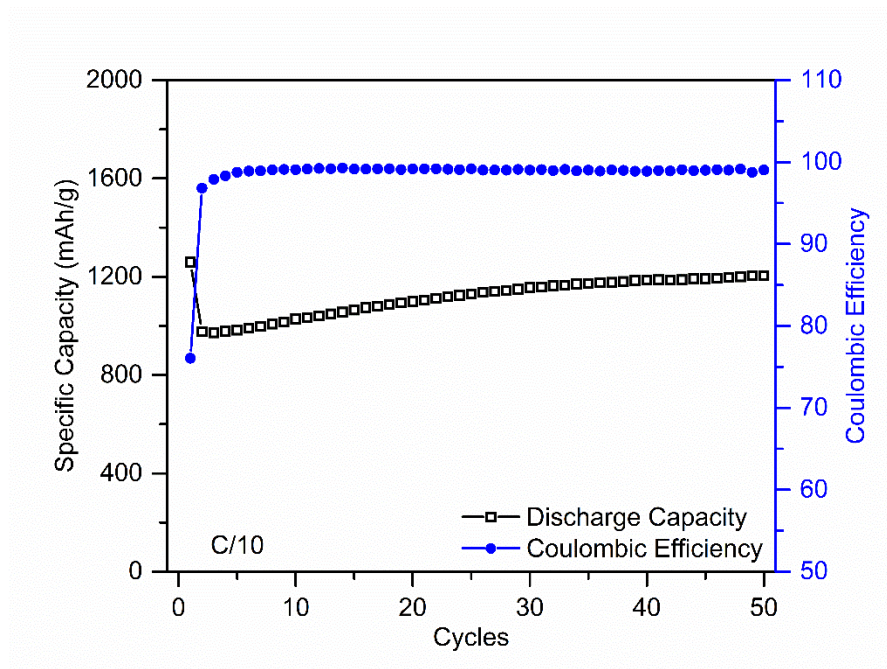

**Figure S6.** Galvanostatic cycling at C/10 rate for  $\text{ZnCo}_2\text{O}_4$  materials prepared by G+CA+AN system. Used to plot voltage profile and differential capacity plot for Figure 10c-d.

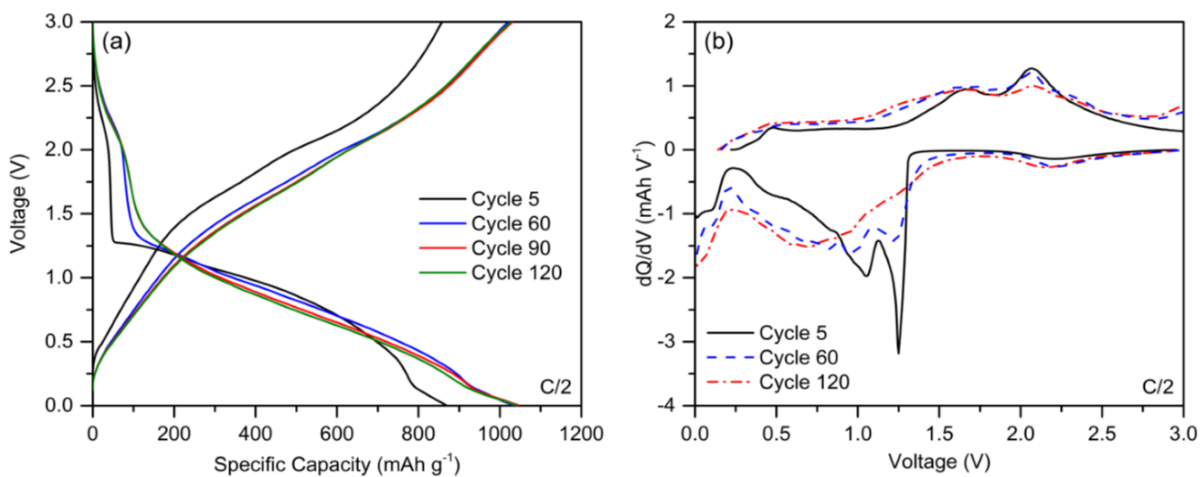

**Figure S7.** Electrochemical analysis of G+CA+AN material for long-term cycling at C/2 rate. (a) Charge-discharge voltage profiles for the 5th, 60th, 90th, and 120th cycles. (b) Differential capacity plots for the 5th, 60th, and 120th cycles.
